# Supplementary material for: First-in-Human Phase I Study of the Activin A Inhibitor, STM 434, in Patients with Granulosa Cell Ovarian Cancer and Other Advanced Solid Tumors
Source: Oxford University Press journal article supplement (doi:10.1158/1078-0432.ccr-19-1065), 2019-05-08
Supplement: 10780432ccr191065-sup-219824_1_supp_5502090_pr355g_r.docx [file 10780432ccr191065-sup-219824_1_supp_5502090_pr355g_r.docx]

**SUPPLEMENTAL FIGURES/TABLES**

Supplemental Table 1: Exposure parameters to STM 434

Supplemental Table 2: Laboratory parameters in STM 434

Supplemental Table 3: Change in ECOG Performance Status

Supplemental Figure 1: Resolution of hepatic steatosis

Supplemental Figure 2: Hereditary hemorrhagic telangiectasia-like cutaneous telangiectasias
